# Supplementary material for: Efficacy of Denosumab for Osteoporosis in Two Patients with Adult-Onset Still’s Disease—Denosumab Efficacy in Osteoporotic Still’s Disease Patients
Source: MDPI journal article supplement (doi:10.3390/jcm7040063), 2018-03-22
Supplement: s1 [file s1]

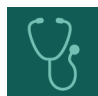

## Supplementary

**Table S1.** Patient characteristics and lumbar and total hip bone mineral density prior to denosumab therapy.

| Characteristic                             | Case 1   | Case 2   |
|--------------------------------------------|----------|----------|
| Age (years)                                | 73       | 48       |
| Gender                                     | Male     | Female   |
| Ethnicity                                  | Japanese | Japanese |
| Glucocorticoids (mg/day)                   | 20       | 20       |
| Lumbar1-4 BMD (L-BMD) (g/cm <sup>2</sup> ) | 1.091    | 0.766    |
| T score of L-BMD                           | -0.7     | -2.9     |
| Total hip BMD (H-BMD) (g/cm <sup>2</sup> ) | 0.894    | 0.664    |
| T score of H-BMD                           | -0.4     | -2.3     |
